# Supplementary material
Source: PubMed Central journal article supplement (PMC11030908)
Supplement: 262_2010_866_MOESM1_ESM.pdf [file 262_2010_866_MOESM1_ESM.pdf]

S-Fig.1

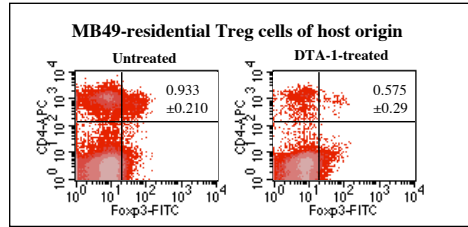

S-Fig.2

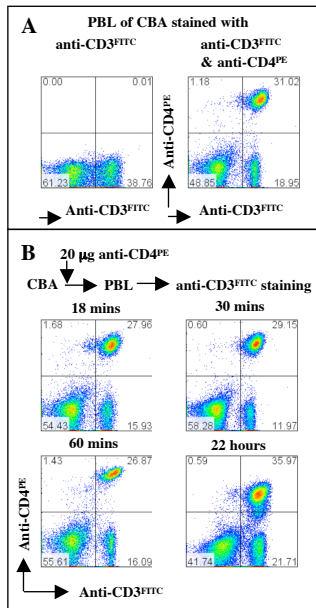

S-Fig.3

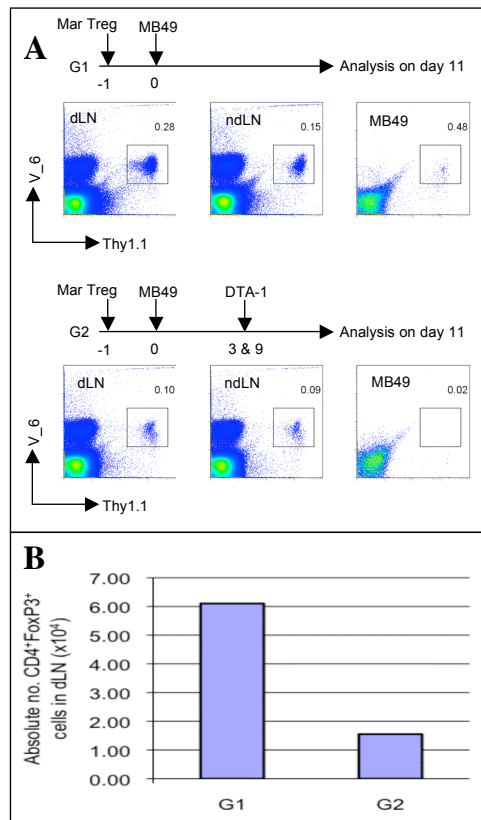

## **Legends for supplementary figures**

### **S-Figure 1. DTA-1 treatment also reduces the percentage of tumour-infiltrated Treg cells of host origin.**

This experiment was conducted as described in Fig.3C. On day 11, MB49 tumours from individual mice in untreated (G2) and DTA-1-treated group (G4) were stained with anti-V $\beta$ 6<sup>PE</sup>, anti-Thy1.1<sup>PerCP</sup> and anti-CD4<sup>APC</sup> followed by intracellular staining of anti-Foxp3<sup>FITC</sup>. Percentage of tumour-infiltrated Treg cells of host origin (Foxp3<sup>+</sup>Thy1.1<sup>-</sup>CD4<sup>+</sup>) of individual mice in each group is shown as mean  $\pm$ SEM. One of representative of two independent experiments is shown.

### **S-Figure 2. Binding to CD4 T cells by injected PE-conjugated anti-CD4 mAb.**

A. The PBL from a group of CBA mice (n=3) were stained with anti-CD3<sup>FITC</sup> alone or together with anti-CD4<sup>PE</sup>. The dot-plots show CD3 versus CD4 expression. FACS profile from one representative of three mice is shown.

B. A group of CBA mice (n=4) were i.v. injected with 20  $\mu$ g of anti-CD4<sup>PE</sup>. 18, 30, 60 minutes or 22 hours later, the PBL were taken from individual mice and stained with anti-CD3<sup>FITC</sup> only. The dot-plots show CD3 versus CD4 expression. FACS profile from one representative of four mice is shown. This experiment was repeated for three times and similar results were obtained.

### **S-Figure 3. Accumulation of adoptively transferred HY-specific Treg cells in MB49 tumours is profoundly impaired following DTA-1 treatment.**

A. CD4<sup>+</sup>CD25<sup>+</sup> cells purified from Rag<sup>+/-</sup> Marilyn Thy1.1 mice were adoptively transferred to two groups of Thy1.2<sup>+</sup> B6 females by i.v. injection (2.6x10<sup>6</sup>/mouse). On the same day, the mice in G1 and G2 were inoculated s.c. with MB49 cells

( $5 \times 10^5$ /mouse). On day 3 and 8, the mice in G2 were treated with 50  $\mu$ g of DTA-1 by i.p. injection, and On day 11, dLN, ndLN and MB49 tumours from individual mice in each group were stained with anti-V $\beta$ 6<sup>PE</sup>, anti-Thy1.1<sup>PerCP</sup> and anti-CD4<sup>APC</sup> followed by intracellular staining of anti-Foxp3<sup>FITC</sup>. Percentage of donor cells (Thy1.1<sup>+</sup>V $\beta$ 6<sup>+</sup>) of one representative mouse from each group is shown.

B. The absolute numbers of donor Treg cells in dLN of G1 and G2 were calculated by total cell number x % of gated lymphocytes x % of donor cells. One representative mouse from each group is shown.
